# Supplementary material
Source: PubMed Central journal article supplement (PMC5831436)

## Supplementary Online Content

Sho S, Yuen AD, Yeh MW, Livhits MJ, Sepahdari AR. Factors associated with discordance between preoperative parathyroid 4-dimensional computed tomographic scans and intraoperative findings during parathyroidectomy. *JAMA Surg*. Published online August 9, 2017. doi:10.1001/jamasurg.2017.2649

### **eFigure.** Comparison of Preoperative US and 4D-CT Findings

This supplementary material has been provided by the authors to give readers additional information about their work.

**eFigure.** Comparison of Preoperative US and 4D-CT Findings

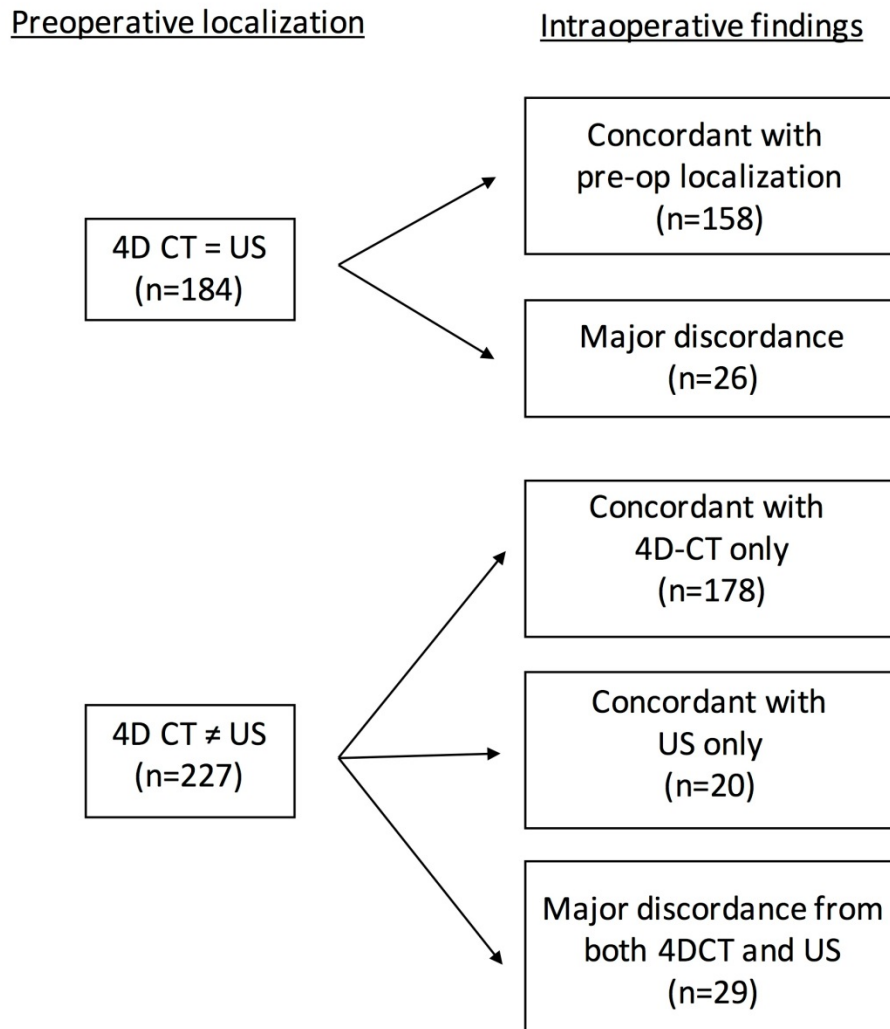

Supplement: jamasurg-152-1141-s001.pdf [file jamasurg-152-1141-s001.pdf]
